# Supplementary material for: Sex-biased genetic effects on gene regulation in humans
Source: HighWire-hosted journal article supplement (doi:10.1101/gr.134981.111), 2012-09-07

**Supplementary tables and figures**

**Sex-biased genetic effects on gene regulation in humans**

Antigone S. Dimas1,2,3, Alexandra C. Nica1, Stephen B. Montgomery1, Barbara E. Stranger,4,5,6, Towfique Raj,4,5,6, Alfonso Buil1, Thomas Giger1, Tuuli Lappalainen1, Maria Gutierrez-Arcelus1, MuTHER Consortium, Mark I. McCarthy2,7,8, Emmanouil T. Dermitzakis1.

1. Department of Genetic Medicine and Development, University of Geneva Medical School, Geneva 1211, Switzerland

2. Wellcome Trust Centre for Human Genetics, University of Oxford, Roosevelt Drive, Oxford OX3 7BN, UK

3. Biomedical Sciences Research Center Al. Fleming, 16672 Vari, Greece

4. Department of Medicine, Division of Genetics, Brigham and Women’s Hospital, Boston, MA, 02115, USA

5. Harvard Medical School, Boston, MA, 02115, USA

6. Program in Medical and Population Genetics, Broad Institute of Harvard and Massachusetts Institute of Technology, Cambridge, MA. 02142, USA

7. Oxford Centre for Diabetes, Endocrinology and Metabolism, University of Oxford, Churchill Hospital, Old Road, Headington, Oxford, OX3 7LJ, UK

8. Oxford NIHR Biomedical Research Centre, Churchill Hospital, Old Road, Headington, Oxford, OX3 7LJ, UK

Correspondence should be addressed to ETD (emmanouil.dermitzakis@unige.ch)

**Table S1. ANOVA with SNP x sex interaction.** TBSD: threshold-based sex discordant. SNP-probes with ANOVA interaction p<=0.05 are designated as sex-biased.


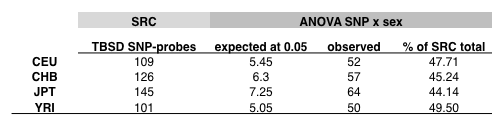


**Table S2. Shared eQTL-genes regulated by independent regulatory variants in females (F) and males (M).** –logp: –log10p-value.


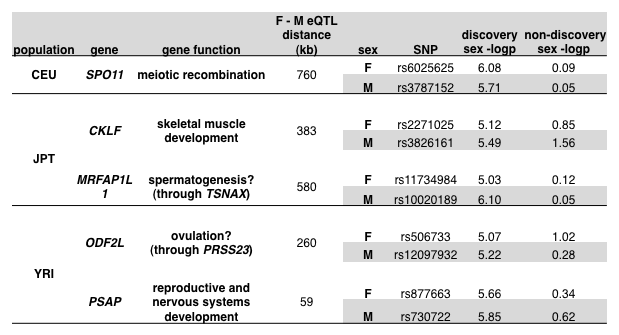


**Table S3. Overlap between sex-biased eQTLs and GWAS SNPs.**


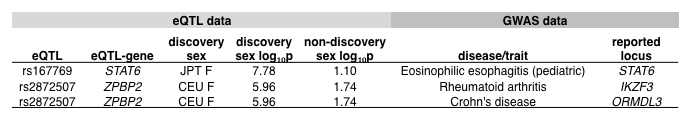


**Figure S1. Log2 gene expression vs. allele for two TBSD eQTL-gene examples in CEU.** (A)*SH3TC1* is a TBSD eQTL-gene in CEU females (CEU F) with Spearman rho=-0.796 and –log10 p-value=12.212, but not in CEU males (CEU M) (B) where rho= -1.750 and –log10 p-value=0.686. Similarly, *PFKFB2* is not an eQTL-gene in CEU F (C) (rho=0.221 and –log10 p-value=0.967, but is an eQTL-gene in CEU M (D) (rho=0.682 and –log10 p-value=7.854).


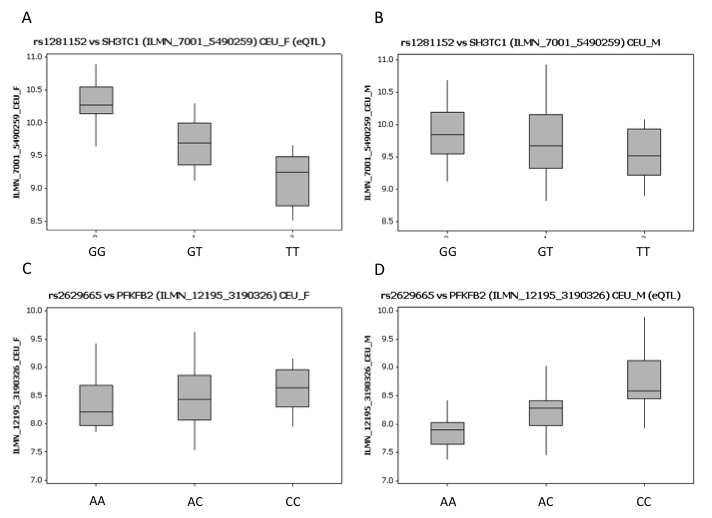


**Figure S2. Comparison of –log10 p-values of TBSD SNP-probes identified in the sex-stratified study (left panels) and corresponding SNP-probes in the whole population sample study (right panels).** Although there is a power difference between the sex-stratified and whole population sample studies (whole population sample size is almost double the size of each sex-stratified study) the higher-powered whole population sample study is significantly depleted for high –log**10** p-values implying that pooling the two sexes dilutes TBSD signals. (A) CEU, (B) CHB, (C) JPT, (D) YRI. Mann-Whitney p-values <10-4 for all comparisons.


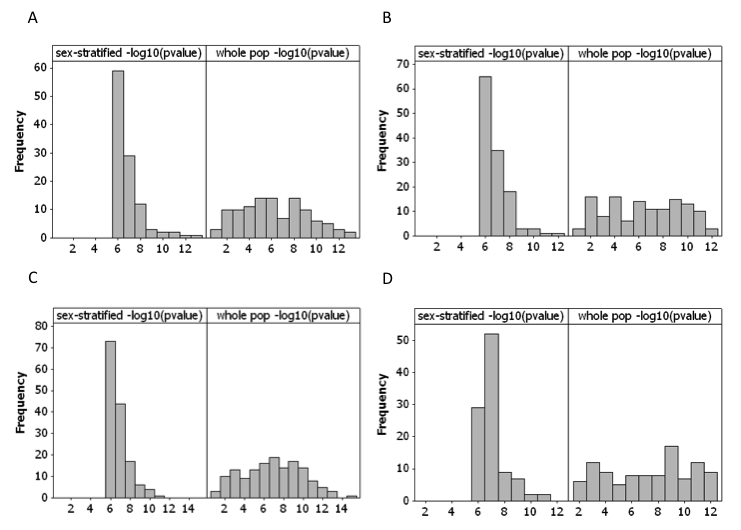


**Figure S3. Percent of expression variance explained by ANOVA SNP x sex interaction.** Percent variance explained by the SNP x sex interaction term is consistently higher for sex-biased vs. shared eQTL-genes (Mann-Whitney p-values <10-4 for all populations). This is also the case for sex-biased vs. TBSD eQTL-genes for CEU and CHB (M-W p-value<10-4 in both cases), JPT (M-W p-value =0.0005) and only in YRI M-W p-value= 0.36. Furthermore, for all populations we observe that M-W p-value for TBSD vs. shared <10-4 implying that TBSD eQTL-genes display non-negligible sex-differentiated genetic effects. Note: in this case sex-biased eQTL-genes were excluded from TBSD eQTL-genes.


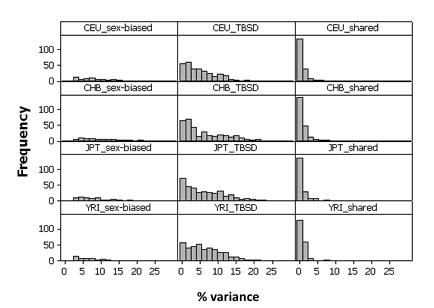


**Figure S4. Log2 gene expression vs. allele, and SNP -log10p-value distribution for *SPO11*.** rs6025625 is an eQTL in CEU females (A) (CEU F Spearman rho=0.613, -log10p-value=6.075) but not in males (B) (CEU M rho=-0.03, log10p-value=0.0918). rs3787152 is not an eQTL in CEU F (C) (rho= 0.018, -log10p-value=0.0483) but is an eQTL in CEU M (D) (rho=0.596, -log10p-value=5.7121). (E) –log10p-value distribution for all SNPs in a 2 MB window centred on *SPO11* (black: CEU F, red: CEU M).


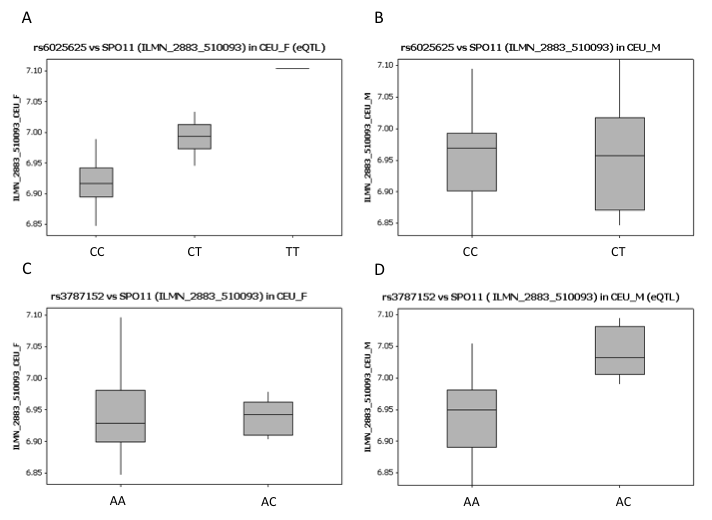


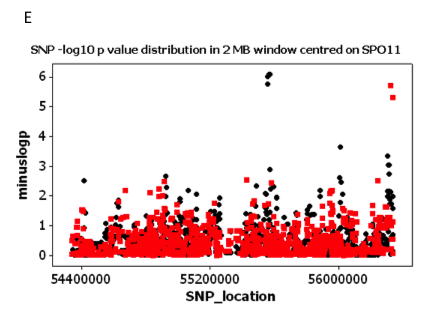


**Figure S5. Log2 gene expression vs. allele, and SNP -log10p-value distribution for *CKLF*.** rs2271025 is an eQTL in JPT females (A) (JPT F Spearman rho=-0.64, -log10p-value=5.125) but not in males (B) (JPT M rho=-0.35, log10p-value=1.557). rs3826161 is not an eQTL in JPT F (C) (rho=-0.23, -log10p-value=0.851) but is an eQTL in JPT M (D) (rho=-0.65, -log10p-value=5.489). (E) –log10p-value distribution for all SNPs in a 2 MB window centred on *CKLF* (black: JPT F, red: JPT M).


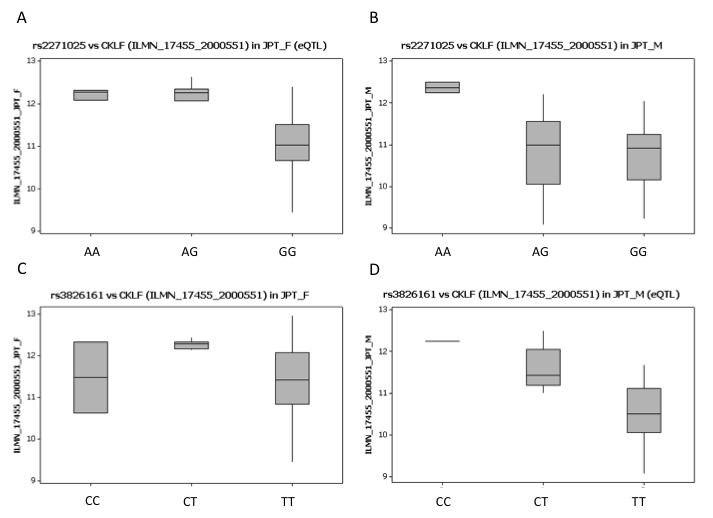


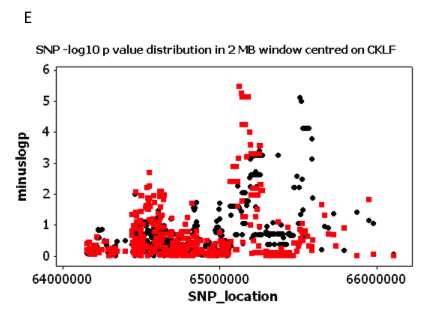


**Figure S6. Log2 gene expression vs. allele, and SNP -log10p-value distribution for *MRFAP1L1*.** rs11734984 is an eQTL in JPT females (A) (JPT F Spearman rho=0.639, -log10p-value=5.032) but not in males (B) (JPT M rho=0.050, -log10p-value=0.123). rs10020189 is not an eQTL in JPT F (C) (rho=-0.022, -log10p-value=0.048) but is an eQTL in JPT M (D) (rho=0.678, -log10p-value=6.101). (E) –log10p-value distribution for all SNPs in a 2 MB window centred on *MRFAP1L1* (black: JPT F, red: JPT M). Note: association is with different probes in each sex (JPT F: ILMN_2298_6020332, JPT M: ILMN_9584_6130180).


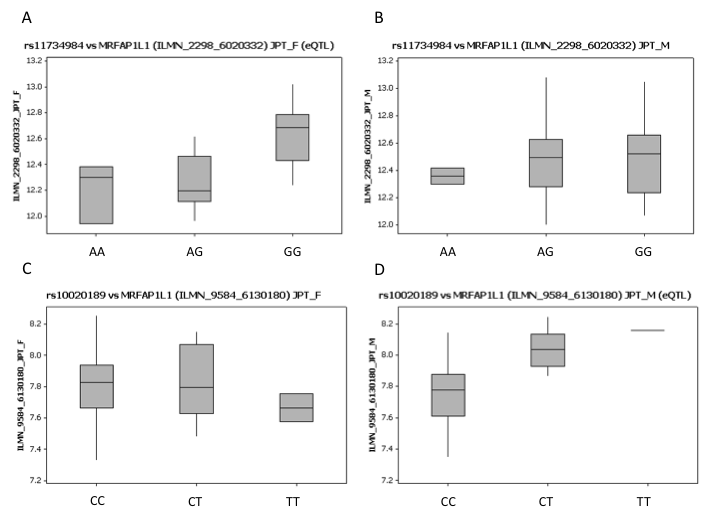


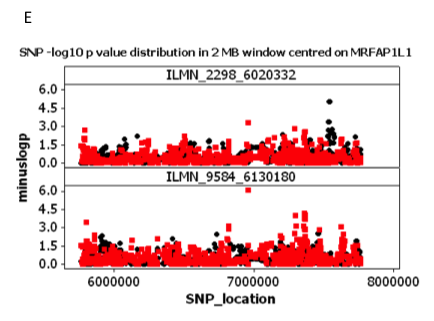


**Figure S7. Log2 gene expression vs. allele, and SNP -log10p-value distribution for *ODF2L*.** rs506733 is an eQTL in YRI females (A) (YRI F Spearman rho=0.570, -log10p-value=5.070) but not in males (B) (YRI M rho=0.226, -log10p-value=1.016). rs12097932 is not an eQTL in YRI F (C) (rho=0.088, -log10p-value=0.276) but is an eQTL in YRI M (D) (rho=-0.568, -log10p-value=5.221). (E) –log10p-value distribution for all SNPs in a 2 MB window centred on *ODF2L* (black: YRI F, red: YRI M). Note: association is with different probes in each sex (YRI F: ILMN_92465_3060400, YRI M: ILMN_18003_6760095).
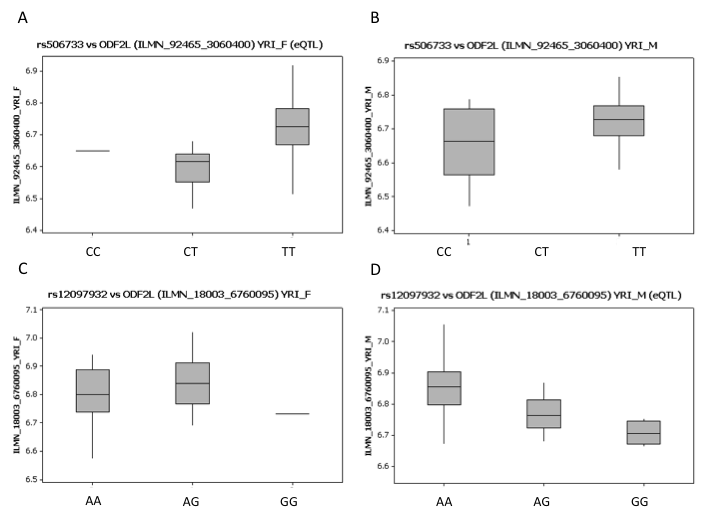


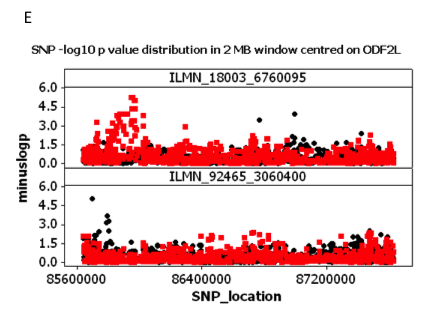


**Figure S8. Log2 gene expression vs. allele, and SNP -log10p-value distribution for *PSAP*.** rs877663 is an eQTL in YRI females (A) (YRI F Spearman rho=0.599, -log10p-value=5.660) but not in males (B) (YRI M rho=-0.102, -log10p-value=0.339). rs730722 is not an eQTL in YRI F (C) (rho=-0.165, -log10p-value=0.624) but is an eQTL in YRI M (D) (rho=0.598, -log10p-value=5.847). (E) –log10p-value distribution for all SNPs in a 2 MB window centred on *PSAP* (black: YRI F, red: YRI M).


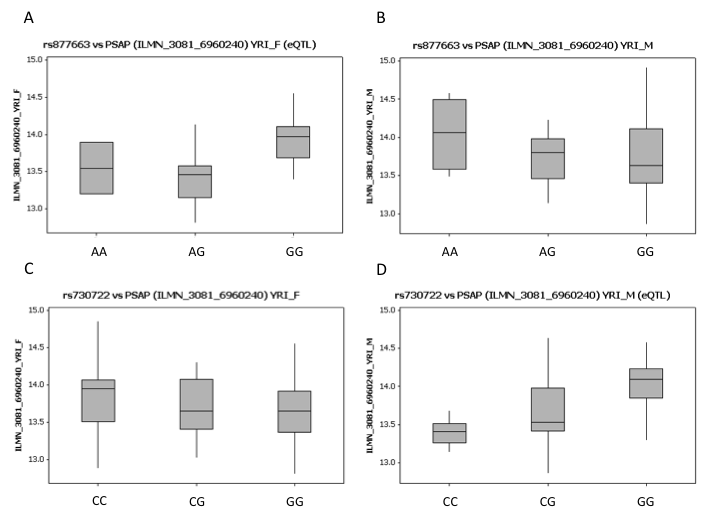


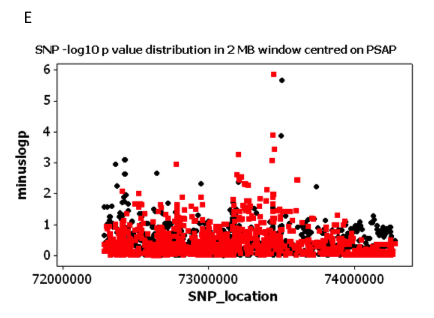


**Figure S9. Comparison of the direction of eQTL allelic effects in females and males.** The direction of allelic effect (determined by the direction of the Spearman rho) was found to be consistent for eQTLs detected in females and males.


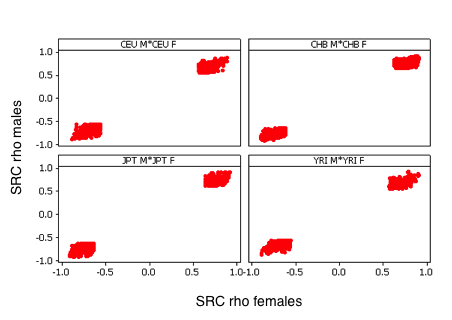


**Figure S10. Distance of shared, TBSD, and sex-biased eQTLs to TSS.** In all populations, shared eQTLs have higher –log10p-values and tend to cluster around the TSS. TBSD and sex-biased eQTLs show lower –log10p-values and span a greater range of distances from the TSS.


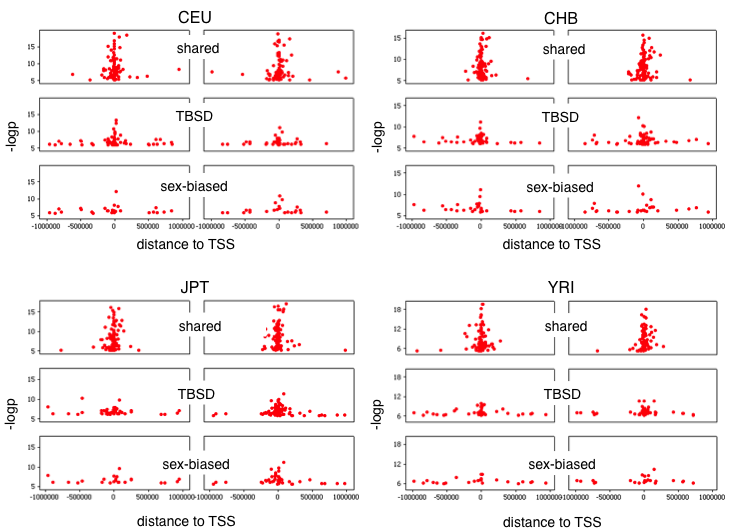


**Figure S11. Significance differential across the sexes for eQTL-genes with ANOVA SNP x sex interaction p<=0.05 (sex-biased) and p>0.05.** Sex-biased eQTLs show greater log10p-value significance differences across the sexes and span a wider range of distances to the TSS (black: sex-biased; red: eQTLs with ANOVA interaction p>0.05).


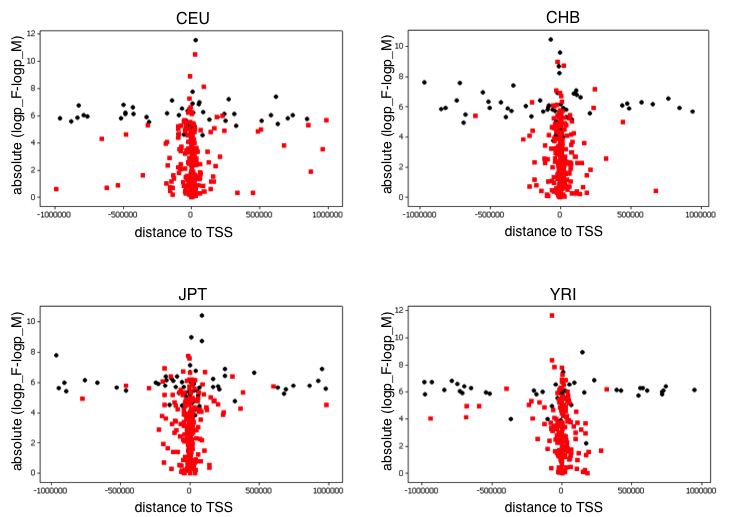


**Figure S12. Expression fold change between major and minor allele homozygotes for shared and sex-biased eQTLs**. Sex-biased eQTLs show greater expression fold change in the discovery sex**.** Expression fold change in females (x axis) and males (y axis) for 56 SNP-probes in CHB females (A) and for 61 SNP-probes in CHB males (B). Although sex-biased eQTLs show greater fold change differences in the discovery sex, there are cases of shared eQTLs that also display prominent fold change differences between females and males e.g. i) *MLF1IP* (fold change: CHB F 1.2; CEU M 0.7), ii) *CAV2* (fold change: CHB F 0.9; CEU M 1.8). Expression fold change in females and males for 64 SNP-probes in JPT females (C) and for 82 SNP-probes in JPT males (D). Cases of shared eQTLs that display prominent fold change differences between females and males include i) *RBMS2* (fold change: JPT F 1.5; JPT M 1.0), ii) *TBC1D4* (fold change: JPT F 1.3; JPT M 2.1). Shared eQTLs: black, sex-biased eQTLs: red.

A B


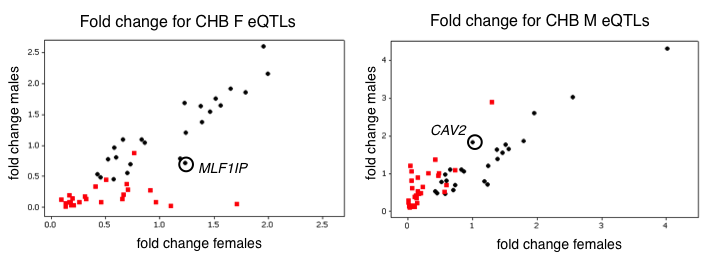


C D


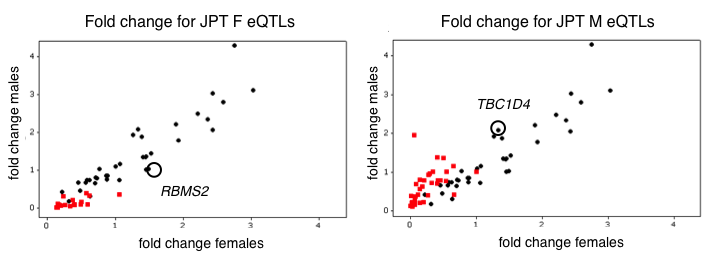


**Figure S13. Log2 gene expression vs. allele, and SNP -log10p-value distribution for *STAT6* and *ZPBP2*.** rs167769 is an eQTL in JPT females (A) (JPT F Spearman rho=-0.756, -log10p-value=7.777) for *STAT6*, but not in males (B) (JPT M rho=-0.274, -log10p-value=1.103). (C) –log10p-value distribution for all SNPs in a 2 MB window centred on *STAT6* (black: JPT F, red: JPT M).rs2872507 is an eQTL in CEU females (D) (CEU F Spearman rho=-0.608, -log10p-value=5.963) for *ZPBP2*, but not in males (E) (CEU M rho=-0.317, -log10p-value=1.738). (F) –log10p-value distribution for all SNPs in a 2 MB window centred on *ZPBP2* (black: CEU F, red: CEU M).
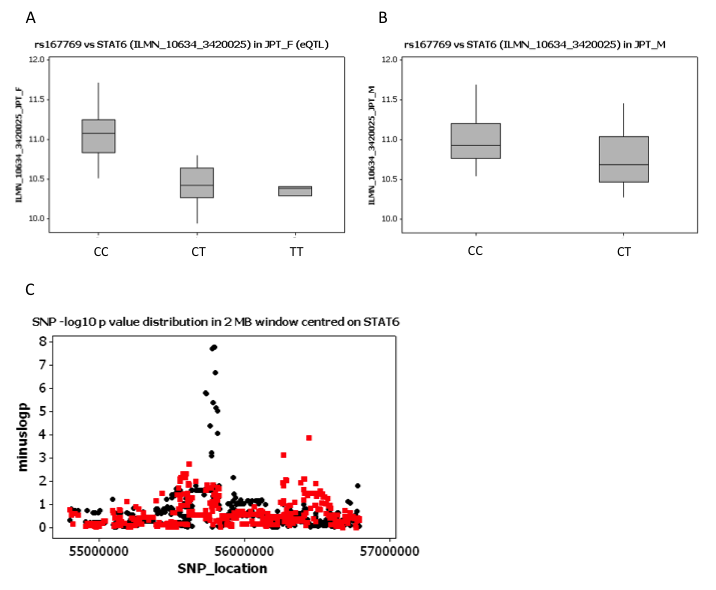


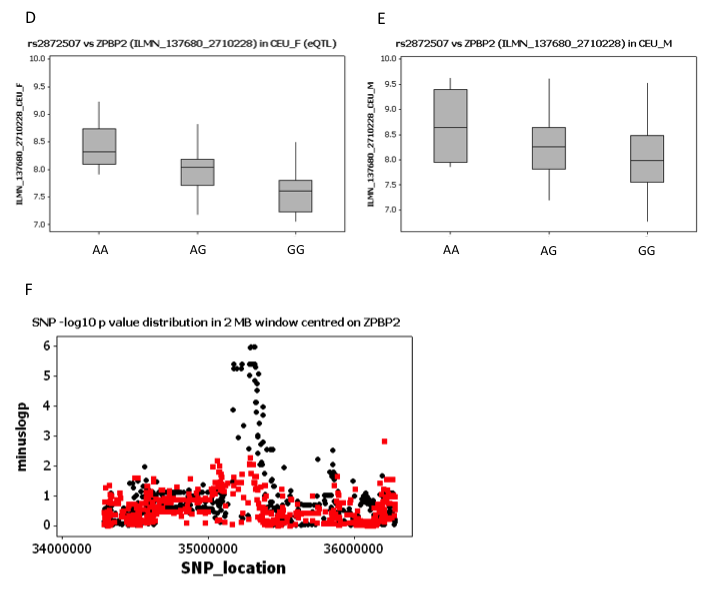

Supplement: Dimas-etal_sex-biased_eqtls_supp_tables_figures_to-submit.docx [file Dimas-etal_sex-biased_eqtls_supp_tables_figures_to-submit.docx]
