# Supplementary material for: Sex-biased genetic effects on gene regulation in humans
Source: HighWire-hosted journal article supplement (doi:10.1101/gr.134981.111), 2012-09-07
Supplement: Dimas-etal_sex-biased_eqtls_supp_table_TBSD_eQTL-genes.xlsx [file Dimas-etal_sex-biased_eqtls_supp_table_TBSD_eQTL-genes.xlsx]

## Sheet: Sheet1
rs_ID	gene	probe	log2_expr_median	-log10(pvalue)	% FDR	source
rs4803830	ENSG00000125753_VASP	ILMN_12821_7330767	11.0086	13.1736	17	CEU_F
rs1281152	ENSG00000125089_SH3TC1	ILMN_7001_5490259	9.96616	12.2121	17	CEU_F
rs2232041	ENSG00000121931_C1orf103	ILMN_11973_110347	7.5927	10.5507	17	CEU_F
rs3763346	ENSG00000204261_PSMB9	ILMN_12611_6130669	10.1725	9.6409	17	CEU_F
rs7951555	ENSG00000110455_ILMN_3829	ILMN_3829_4860048	8.40624	9.068	17	CEU_F
rs6454082	ENSG00000146243_IRAK1BP1	ILMN_5636_2650451	9.16539	8.8345	17	CEU_F
rs2329442	ENSG00000160207_HSF2BP	ILMN_8863_4860315	7.04706	8.2575	17	CEU_F
rs3782235	ENSG00000076067_RBMS2	ILMN_3505_1690500	7.79382	8.1558	17	CEU_F
rs243325	ENSG00000175643_C16orf75	ILMN_5047_4290465	11.1741	7.7403	17	CEU_F
rs3746438	ENSG00000100991_TRPC4AP	ILMN_20082_4260520	10.4589	7.6462	17	CEU_F
rs3809260	ENSG00000111666_CHPT1	ILMN_24076_650504	10.2266	7.6059	17	CEU_F
rs7126805	ENSG00000177697_CD151	ILMN_138040_1980180	8.09502	7.5755	17	CEU_F
rs7842923	ENSG00000130227_XPO7	ILMN_26591_4200471	6.98777	7.5164	17	CEU_F
rs35293564	ENSG00000109181_UGT2B10	ILMN_4885_5560768	7.0409	7.5156	17	CEU_F
rs422945	ENSG00000159593_APPBP1	ILMN_19510_4060465	7.33182	7.4735	17	CEU_F
rs6449097	ENSG00000109667_SLC2A9	ILMN_28034_4590201	6.91519	7.3126	17	CEU_F
rs1948721	ENSG00000180611_C3orf59	ILMN_14619_7510148	11.1449	7.2517	17	CEU_F
rs5759580	ENSG00000128322_IGLL1	ILMN_4340_6040563	6.61617	7.1892	17	CEU_F
rs909287	ENSG00000119698_KIAA1622	ILMN_22106_1580609	6.91358	7.1107	17	CEU_F
rs2231292	ENSG00000069966_GNB5	ILMN_2015_6450086	7.39912	7.0215	17	CEU_F
rs11070836	ENSG00000166477_LEO1	ILMN_14593_4060044	10.85	7.0098	17	CEU_F
rs6083977	ENSG00000100997_ABHD12	ILMN_15850_770022	8.76702	6.9379	17	CEU_F
rs4809426	ENSG00000101190_TCFL5	ILMN_12278_6660577	10.3465	6.8586	17	CEU_F
rs2273058	ENSG00000101343_CRNKL1	ILMN_827_1430441	8.559	6.8237	17	CEU_F
rs4803372	ENSG00000123815_ADCK4	ILMN_26138_1690221	8.89209	6.7393	17	CEU_F
rs4582090	ENSG00000173226_IQCB1	ILMN_9902_6370382	11.904	6.6503	17	CEU_F
rs3895340	ENSG00000135821_GLUL	ILMN_25881_6110050	6.88252	6.6249	17	CEU_F
rs1061135	ENSG00000107521_HPS1	ILMN_2724_1050148	8.35068	6.5825	17	CEU_F
rs11070784	ENSG00000104047_DTWD1	ILMN_3248_4810112	10.1644	6.5591	17	CEU_F
rs2413692	ENSG00000189306_ILMN_12816	ILMN_12816_1990646	10.2763	6.5462	17	CEU_F
rs293871	ENSG00000152492_CCDC50	ILMN_12635_4200296	6.99472	6.5176	17	CEU_F
rs34947817	ENSG00000213214_ILMN_28207	ILMN_28207_4830414	7.39181	6.5025	17	CEU_F
rs7300076	ENSG00000123096_SSPN	ILMN_20454_1470086	7.36567	6.4946	17	CEU_F
rs7809	ENSG00000087008_ACOX3	ILMN_4422_7650575	10.6383	6.4917	17	CEU_F
rs7875342	ENSG00000164978_NUDT2	ILMN_4869_4480161	11.6853	6.4661	17	CEU_F
rs10419425	ENSG00000127507_EMR2	ILMN_7897_7320373	8.48237	6.4587	17	CEU_F
rs581829	ENSG00000128578_FAM40B	ILMN_18452_160286	7.05465	6.4077	17	CEU_F
rs801074	ENSG00000160828_ILMN_5961	ILMN_5961_7650035	7.53555	6.374	17	CEU_F
rs513736	ENSG00000170430_MGMT	ILMN_18705_130309	11.8191	6.3439	17	CEU_F
rs862242	ENSG00000205464_ILMN_15537	ILMN_15537_1430278	7.61488	6.3244	17	CEU_F
rs3798103	ENSG00000164404_GDF9	ILMN_2923_6520544	6.89567	6.2453	17	CEU_F
rs2424451	ENSG00000125831_CST11	ILMN_19295_5360382	6.65838	6.2193	17	CEU_F
rs5751474	ENSG00000183569_SERHL	ILMN_12639_1430220	7.10534	6.2186	17	CEU_F
rs4786303	ENSG00000213957_ILMN_22977	ILMN_22977_2690056	7.30772	6.195	17	CEU_F
rs2296487	ENSG00000166166_C14orf172	ILMN_11479_4670286	8.48758	6.1576	17	CEU_F
rs1061810	ENSG00000149084_HSD17B12	ILMN_19305_3290411	12.4753	6.1231	17	CEU_F
rs8103186	ENSG00000170954_ZNF415	ILMN_16495_5550050	7.14933	6.1053	17	CEU_F
rs12957891	ENSG00000176194_CIDEA	ILMN_5808_4200048	6.65067	6.1025	17	CEU_F
rs7906409	ENSG00000198610_AKR1C4	ILMN_22268_6450544	6.7006	6.0608	17	CEU_F
rs6431549	ENSG00000144488_ESPNL	ILMN_15609_2900372	7.07249	6.0414	17	CEU_F
rs2334867	ENSG00000063127_SLC6A16	ILMN_10688_20735	7.29061	5.9927	17	CEU_F
rs979957	ENSG00000115827_C2orf37	ILMN_30071_2350722	8.40027	5.9902	17	CEU_F
rs7661303	ENSG00000151552_QDPR	ILMN_26096_2480551	12.0175	5.9835	17	CEU_F
rs4284750	ENSG00000188171_ZNF626	ILMN_137796_2970564	9.16671	5.9724	17	CEU_F
rs2872507	ENSG00000186075_ZPBP2	ILMN_137680_2710228	7.98694	5.963	17	CEU_F
rs7794040	ENSG00000189077_TMEM120A	ILMN_9004_5560577	10.6181	5.9472	17	CEU_F
rs1469482	ENSG00000182814_ILMN_27841	ILMN_27841_4570348	6.77576	5.9433	17	CEU_F
rs915013	ENSG00000112531_QKI	ILMN_45956_1660746	7.43904	5.9077	17	CEU_F
rs137180	ENSG00000128294_TPST2	ILMN_13248_430609	10.5517	5.8916	17	CEU_F
rs6953458	ENSG00000128510_CPA4	ILMN_21403_1820068	7.14897	5.8906	17	CEU_F
rs7444307	ENSG00000168916_ZNF608	ILMN_19900_3440333	7.79436	5.8357	17	CEU_F
rs7905087	ENSG00000171160_C10orf83	ILMN_21995_20100	7.57713	5.8223	17	CEU_F
rs12693257	ENSG00000162992_NEUROD1	ILMN_1169_6350520	6.7196	5.8002	17	CEU_F
rs479777	ENSG00000168071_CCDC88B	ILMN_137122_1440324	7.87275	5.7944	17	CEU_F
rs11852841	ENSG00000140538_NTRK3	ILMN_100755_2320553	6.48191	5.7917	17	CEU_F
rs1344	ENSG00000162836_ACP6	ILMN_24835_3180376	8.99525	5.7858	17	CEU_F
rs2271509	ENSG00000132182_NUP210	ILMN_22933_6020500	10.5685	5.7539	17	CEU_F
rs2071059	ENSG00000010626_LRRC23	ILMN_22825_1940692	9.89461	5.7529	17	CEU_F
rs2764546	ENSG00000064886_CHI3L2	ILMN_1295_2340291	10.4978	11.0053	16	CEU_M
rs4806115	ENSG00000105697_HAMP	ILMN_25191_4250768	6.93513	9.7742	16	CEU_M
rs11065504	ENSG00000110931_CAMKK2	ILMN_9437_5860020	8.63458	8.8665	16	CEU_M
rs10873395	ENSG00000100814_CCNB1IP1	ILMN_16772_5050438	6.83993	7.8797	16	CEU_M
rs2629665	ENSG00000123836_PFKFB2	ILMN_12195_3190326	8.33098	7.8542	16	CEU_M
rs2041185	ENSG00000205659_LIN52	ILMN_28590_4730170	8.46764	7.6275	16	CEU_M
rs2289965	ENSG00000179057_IGSF22	ILMN_3130_150577	7.20012	7.5787	16	CEU_M
rs11803220	ENSG00000198216_CACNA1E	ILMN_9310_2760452	7.50773	7.3099	16	CEU_M
rs6982159	ENSG00000172728_FUT10	ILMN_18464_4480243	7.27407	6.9975	16	CEU_M
rs4092294	ENSG00000177738_ILMN_44328	ILMN_44328_1050292	7.08638	6.9739	16	CEU_M
rs4801950	ENSG00000170949_ZNF160	ILMN_25264_460132	7.10503	6.9736	16	CEU_M
rs4729789	ENSG00000005075_POLR2J	ILMN_4217_4810594	8.73953	6.8751	16	CEU_M
rs4622507	ENSG00000159387_IRX6	ILMN_42195_6770037	7.02906	6.8033	16	CEU_M
rs10877014	ENSG00000123427_FAM119B	ILMN_12426_4540301	9.89718	6.773	16	CEU_M
rs636519	ENSG00000139514_SLC7A1	ILMN_22619_2970739	11.958	6.7281	16	CEU_M
rs13276958	ENSG00000169398_PTK2	ILMN_20899_2070273	7.09194	6.6978	16	CEU_M
rs7673898	ENSG00000145217_SLC26A1	ILMN_19254_3450296	6.88876	6.6677	16	CEU_M
rs10151824	ENSG00000032219_ARID4A	ILMN_17714_6060068	7.67166	6.5661	16	CEU_M
rs580699	ENSG00000116985_BMP8B	ILMN_3865_70167	7.24837	6.4795	16	CEU_M
rs6765093	ENSG00000163781_TOPBP1	ILMN_24939_6100072	10.7356	6.4104	16	CEU_M
rs4148974	ENSG00000160194_NDUFV3	ILMN_17835_6020161	8.93221	6.4077	16	CEU_M
rs16834426	ENSG00000065371_ROPN1	ILMN_9116_60500	6.63253	6.185	16	CEU_M
rs7373154	ENSG00000144659_SLC25A38	ILMN_9590_1410471	9.88012	6.1731	16	CEU_M
rs9379858	ENSG00000186470_BTN3A2	ILMN_29654_4920577	10.7909	6.1724	16	CEU_M
rs622099	ENSG00000088812_ATRN	ILMN_6173_940711	7.90388	6.1695	16	CEU_M
rs1128097	ENSG00000196367_TRRAP	ILMN_18258_3850286	11.3898	6.1658	16	CEU_M
rs303900	ENSG00000168405_CMAH	ILMN_13868_4010019	8.18421	6.1583	16	CEU_M
rs567606	ENSG00000110074_FOXRED1	ILMN_23866_3890044	10.9839	6.06	16	CEU_M
rs12731669	ENSG00000143226_FCGR2A	ILMN_26366_4730397	7.55086	6.0447	16	CEU_M
rs2644898	ENSG00000105352_CEACAM4	ILMN_8917_1090767	7.23178	6.0352	16	CEU_M
rs1876839	ENSG00000162931_TRIM17	ILMN_24187_3290373	7.10559	6.0331	16	CEU_M
rs11850328	ENSG00000119684_MLH3	ILMN_17253_60180	7.2744	6.0331	16	CEU_M
rs2160195	ENSG00000211700_ILMN_43020	ILMN_43020_3780021	6.90272	6.0065	16	CEU_M
rs1051148	ENSG00000111850_C6orf162	ILMN_17997_3060368	8.40704	5.9929	16	CEU_M
rs8064748	ENSG00000072210_ALDH3A2	ILMN_15293_3190328	10.1123	5.9868	16	CEU_M
rs7037806	ENSG00000136861_CDK5RAP2	ILMN_3896_3800482	10.8722	5.9801	16	CEU_M
rs8005065	ENSG00000126214_KLC1	ILMN_29662_240687	10.2539	5.9448	16	CEU_M
rs11756587	ENSG00000122335_SERAC1	ILMN_7584_6130110	7.21946	5.9374	16	CEU_M
rs7245929	ENSG00000204611_ZNF616	ILMN_2440_6560291	8.21728	5.9321	16	CEU_M
rs12142922	ENSG00000117226_GBP3	ILMN_3653_5340136	7.09102	5.91	16	CEU_M
rs2051329	ENSG00000160188_RSPH1	ILMN_23999_3990670	8.12213	5.9004	16	CEU_M
rs4801882	ENSG00000105501_SIGLEC5	ILMN_10829_4490445	7.00547	11.0936	14	CHB_F
rs7201780	ENSG00000102882_MAPK3	ILMN_11845_4920376	12.7751	9.6329	14	CHB_F
rs10913578	ENSG00000117533_VAMP4	ILMN_139375_1690647	9.39913	8.5059	14	CHB_F
rs12603276	ENSG00000108272_ILMN_12069	ILMN_12069_7000435	9.69164	8.2914	14	CHB_F
rs327588	ENSG00000124275_MTRR	ILMN_13753_3520296	11.4797	8.1264	14	CHB_F
rs1683570	ENSG00000175221_MED16	ILMN_137150_4590392	7.90916	8.053	14	CHB_F
rs224333	ENSG00000101019_UQCC	ILMN_1226_6620707	11.5609	7.9163	14	CHB_F
rs1779958	ENSG00000197472_ZNF695	ILMN_11705_6650273	8.13693	7.8235	14	CHB_F
rs589793	ENSG00000178776_ILMN_26219	ILMN_26219_5820553	6.80884	7.7554	14	CHB_F
rs10853177	ENSG00000166750_SLFN5	ILMN_25790_1110273	8.25932	7.7489	14	CHB_F
rs10926688	ENSG00000197769_MAP1LC3C	ILMN_1960_670646	6.81245	7.6422	14	CHB_F
rs17408108	ENSG00000064115_TM7SF3	ILMN_7797_5130138	9.65628	7.4684	14	CHB_F
rs17136868	ENSG00000152503_TRIM36	ILMN_6503_4290653	7.03367	7.3705	14	CHB_F
rs4897398	ENSG00000164484_KIAA1913	ILMN_19059_1820600	10.2003	7.2976	14	CHB_F
rs4406078	ENSG00000171476_ILMN_1899	ILMN_1899_1470681	7.23618	7.2325	14	CHB_F
rs28513374	ENSG00000128886_ELL3	ILMN_26458_650021	8.81364	7.1278	14	CHB_F
rs4982856	ENSG00000100889_PCK2	ILMN_18787_7400450	7.7008	6.9919	14	CHB_F
rs10133762	ENSG00000165929_TC2N	ILMN_14641_3890646	9.10617	6.9526	14	CHB_F
rs2986410	ENSG00000149089_APIP	ILMN_15379_2650471	11.5952	6.8587	14	CHB_F
rs6431565	ENSG00000124839_RAB17	ILMN_9806_110440	6.87312	6.8176	14	CHB_F
rs7852659	ENSG00000148339_SLC25A25	ILMN_15178_2640129	6.95223	6.8039	14	CHB_F
rs2289265	ENSG00000055147_C5orf3	ILMN_19681_1170079	8.67228	6.7398	14	CHB_F
rs2446193	ENSG00000141994_DUS3L	ILMN_3805_3290379	10.203	6.5814	14	CHB_F
rs11207949	ENSG00000162606_L1TD1	ILMN_19524_6250561	7.55208	6.577	14	CHB_F
rs3761846	ENSG00000056558_TRAF1	ILMN_5830_3450692	11.4384	6.5351	14	CHB_F
rs6107422	ENSG00000149451_ADAM33	ILMN_22414_10576	7.13859	6.5232	14	CHB_F
rs9755247	ENSG00000187068_ILMN_12201	ILMN_12201_4040504	7.18436	6.5182	14	CHB_F
rs2731063	ENSG00000177627_C12orf54	ILMN_26449_2510523	7.29327	6.5021	14	CHB_F
rs888096	ENSG00000115828_QPCT	ILMN_6510_4780672	7.44947	6.4855	14	CHB_F
rs6532770	ENSG00000187758_ADH1A	ILMN_8119_6020441	6.83366	6.4577	14	CHB_F
rs11021958	ENSG00000110321_EIF4G2	ILMN_19314_7560132	14.1221	6.4486	14	CHB_F
rs7940691	ENSG00000172543_CTSW	ILMN_4961_2190021	6.98209	6.3528	14	CHB_F
rs10503364	ENSG00000164816_DEFA5	ILMN_2556_2230221	6.87447	6.3356	14	CHB_F
rs189772	ENSG00000129214_SHBG	ILMN_18112_1510497	6.64956	6.3028	14	CHB_F
rs1800802	ENSG00000151490_PTPRO	ILMN_7633_940133	8.60731	6.2957	14	CHB_F
rs904205	ENSG00000154102_C16orf74	ILMN_26575_20224	7.8017	6.2789	14	CHB_F
rs1052270	ENSG00000136842_TMOD1	ILMN_1052_1780477	10.7488	6.2718	14	CHB_F
rs4635231	ENSG00000120675_DNAJC15	ILMN_18054_7550088	10.4188	6.2687	14	CHB_F
rs12635904	ENSG00000114107_CEP70	ILMN_17733_1030086	7.86283	6.2525	14	CHB_F
rs17081271	ENSG00000154330_PGM5	ILMN_10700_2570129	6.95329	6.131	14	CHB_F
rs12291142	ENSG00000110090_CPT1A	ILMN_14446_1660019	8.04116	6.1285	14	CHB_F
rs10492110	ENSG00000150045_KLRF1	ILMN_25563_6980113	6.92814	6.1165	14	CHB_F
rs11249671	ENSG00000174339_OR2Y1	ILMN_21909_5490594	7.04916	6.1125	14	CHB_F
rs28497408	ENSG00000100239_SAPS2	ILMN_16847_510471	7.03926	6.1122	14	CHB_F
rs2030798	ENSG00000205903_ILMN_39766	ILMN_39766_2600537	6.75239	6.0676	14	CHB_F
rs1340977	ENSG00000132185_FCRLA	ILMN_2598_290279	13.8602	6.0676	14	CHB_F
rs214065	ENSG00000124508_BTN2A2	ILMN_15223_4220494	7.31308	6.0664	14	CHB_F
rs2272783	ENSG00000066926_FECH	ILMN_5447_3170241	9.18527	6.0025	14	CHB_F
rs7236968	ENSG00000197971_MBP	ILMN_3041_2360242	8.28067	5.9947	14	CHB_F
rs3212964	ENSG00000012061_ERCC1	ILMN_9100_3460703	10.0825	5.9691	14	CHB_F
rs691577	ENSG00000128626_MRPS12	ILMN_19234_1850279	7.00232	5.9541	14	CHB_F
rs827000	ENSG00000087008_ACOX3	ILMN_4422_7650575	10.6376	12.0646	13	CHB_M
rs884004	ENSG00000169245_CXCL10	ILMN_5066_7380544	8.90846	10.1768	13	CHB_M
rs10972063	ENSG00000164978_NUDT2	ILMN_4869_4480161	12.0626	10.0731	13	CHB_M
rs2245389	ENSG00000136856_SLC2A8	ILMN_403_1090669	10.453	8.8096	13	CHB_M
rs7517812	ENSG00000162441_LZIC	ILMN_17648_4060008	9.05797	8.5155	13	CHB_M
rs11000530	ENSG00000166321_NUDT13	ILMN_28231_3190608	6.97888	8.4333	13	CHB_M
rs7127924	ENSG00000110455_ILMN_3829	ILMN_3829_4860048	9.81532	8.2217	13	CHB_M
rs7186326	ENSG00000008710_PKD1	ILMN_8740_1580292	7.94985	8.0131	13	CHB_M
rs3763131	ENSG00000131459_GFPT2	ILMN_7613_5420053	7.25152	7.9746	13	CHB_M
rs826443	ENSG00000180644_PRF1	ILMN_28175_4480435	8.14908	7.9573	13	CHB_M
rs12445639	ENSG00000140950_KIAA1609	ILMN_4393_2680356	6.7856	7.7698	13	CHB_M
rs1464264	ENSG00000188042_ARL4C	ILMN_15416_6220674	7.72094	7.6825	13	CHB_M
rs2279407	ENSG00000159579_RSPRY1	ILMN_24289_2000139	11.5534	7.5852	13	CHB_M
rs16832572	ENSG00000198130_HIBCH	ILMN_24767_1740392	11.5155	7.5574	13	CHB_M
rs11064157	ENSG00000111321_LTBR	ILMN_30110_1050750	7.07516	7.5117	13	CHB_M
rs798727	ENSG00000174137_FAM53A	ILMN_11044_5560241	7.70191	7.4343	13	CHB_M
rs9754402	ENSG00000128408_RIBC2	ILMN_29387_3840220	6.71836	7.4264	13	CHB_M
rs3765640	ENSG00000012048_BRCA1	ILMN_5998_3120095	9.75189	7.347	13	CHB_M
rs10887878	ENSG00000026103_FAS	ILMN_9068_7610196	9.73699	7.3194	13	CHB_M
rs755717	ENSG00000140931_CMTM3	ILMN_15078_7380239	10.164	7.2402	13	CHB_M
rs3751691	ENSG00000167526_RPL13	ILMN_2271_290646	13.5804	7.1335	13	CHB_M
rs601136	ENSG00000196376_SLC35F1	ILMN_2907_520168	7.05491	7.0972	13	CHB_M
rs3773409	ENSG00000134121_CHL1	ILMN_8113_1090192	7.42401	7.0793	13	CHB_M
rs514024	ENSG00000119392_GLE1L	ILMN_18966_7510369	8.95812	6.9551	13	CHB_M
rs8060332	ENSG00000167978_SRRM2	ILMN_21088_5090504	12.1364	6.9067	13	CHB_M
rs1956896	ENSG00000100445_C14orf124	ILMN_4144_6590270	8.07705	6.8522	13	CHB_M
rs10239341	ENSG00000196584_XRCC2	ILMN_23276_2900497	7.1995	6.7771	13	CHB_M
rs264202	ENSG00000154864_FAM38B	ILMN_10543_1410121	7.5696	6.7448	13	CHB_M
rs1885498	ENSG00000107018_ILMN_28164	ILMN_28164_6860465	7.91861	6.6456	13	CHB_M
rs2635482	ENSG00000104497_SNX16	ILMN_6842_6400255	8.40685	6.643	13	CHB_M
rs10790330	ENSG00000196655_TRAPPC4	ILMN_27198_6650563	12.1153	6.6281	13	CHB_M
rs7161563	ENSG00000100490_CDKL1	ILMN_7869_6620619	7.57485	6.5471	13	CHB_M
rs1893126	ENSG00000168461_RAB31	ILMN_6528_7570603	10.9989	6.5072	13	CHB_M
rs2365403	ENSG00000154217_PITPNC1	ILMN_12660_5960189	8.27187	6.4814	13	CHB_M
rs7302925	ENSG00000176422_SPRYD4	ILMN_28886_7560180	9.20369	6.4432	13	CHB_M
rs10877014	ENSG00000123427_FAM119B	ILMN_12426_4540301	10.5079	6.4432	13	CHB_M
rs6498291	ENSG00000048462_TNFRSF17	ILMN_17574_1580022	13.2288	6.4422	13	CHB_M
rs2289065	ENSG00000145247_OCIAD2	ILMN_18246_1990471	11.3846	6.4117	13	CHB_M
rs10955290	ENSG00000155090_KLF10	ILMN_2466_5810280	8.6896	6.3562	13	CHB_M
rs12485220	ENSG00000185838_GNB1L	ILMN_21429_2360021	9.92271	6.3423	13	CHB_M
rs478290	ENSG00000175773_ILMN_138075	ILMN_138075_5390762	6.93124	6.3113	13	CHB_M
rs3784275	ENSG00000184716_SERINC4	ILMN_5169_160181	7.31281	6.3106	13	CHB_M
rs9520988	ENSG00000174405_LIG4	ILMN_25322_6900079	6.93061	6.2954	13	CHB_M
rs1403149	ENSG00000143867_OSR1	ILMN_5789_160008	6.74408	6.2925	13	CHB_M
rs11999802	ENSG00000096968_JAK2	ILMN_12566_3460041	9.55681	6.2873	13	CHB_M
rs17017907	ENSG00000183634_ILMN_3385	ILMN_3385_4480463	7.63946	6.2725	13	CHB_M
rs2076015	ENSG00000125827_TXNDC13	ILMN_23065_1940259	9.6151	6.2525	13	CHB_M
rs12609667	ENSG00000083828_ZNF586	ILMN_23441_3520128	11.7506	6.2484	13	CHB_M
rs2297236	ENSG00000064393_HIPK2	ILMN_34517_1170132	6.85109	6.211	13	CHB_M
rs2156407	ENSG00000185917_SETD4	ILMN_28718_4070053	9.12216	6.2107	13	CHB_M
rs2764546	ENSG00000064886_CHI3L2	ILMN_1036_1450400	12.8906	6.1424	13	CHB_M
rs4417557	ENSG00000104731_KLHDC4	ILMN_8527_3830500	10.7312	6.1251	13	CHB_M
rs7796084	ENSG00000106415_GLCCI1	ILMN_22544_5260278	9.73709	6.1068	13	CHB_M
rs1998637	ENSG00000151461_UPF2	ILMN_21163_2230307	10.25	6.0884	13	CHB_M
rs230280	ENSG00000116985_BMP8B	ILMN_3865_70167	7.30864	6.082	13	CHB_M
rs1121122	ENSG00000187676_B3GALTL	ILMN_25412_630110	7.26985	6.0617	13	CHB_M
rs8181357	ENSG00000214275_ILMN_1367	ILMN_1367_1470634	6.81955	6.0378	13	CHB_M
rs1505600	ENSG00000163637_PRICKLE2	ILMN_27101_4280411	7.09178	6.0349	13	CHB_M
rs2655310	ENSG00000151470_C4orf33	ILMN_4988_1260685	10.8769	6.0057	13	CHB_M
rs798502	ENSG00000146535_GNA12	ILMN_138087_2900288	8.42627	6.0033	13	CHB_M
rs10772285	ENSG00000213809_KLRC4	ILMN_29874_6480543	6.86856	6.0023	13	CHB_M
rs8111456	ENSG00000076662_ICAM3	ILMN_9707_5810681	14.0372	5.994	13	CHB_M
rs4837096	ENSG00000148356_LRSAM1	ILMN_21244_6350711	6.70654	5.9778	13	CHB_M
rs7501402	ENSG00000167508_MVD	ILMN_2771_3390743	10.0624	5.9751	13	CHB_M
rs1162757	ENSG00000122912_SLC25A16	ILMN_14719_3840309	8.28496	5.9561	13	CHB_M
rs2531003	ENSG00000188707_C7orf29	ILMN_27248_5220703	7.59573	5.9242	13	CHB_M
rs4233414	ENSG00000143194_MAEL	ILMN_16726_3140110	7.0446	5.9021	13	CHB_M
rs11203166	ENSG00000160194_NDUFV3	ILMN_17835_6020161	8.94797	5.9018	13	CHB_M
rs4246617	ENSG00000115840_SLC25A12	ILMN_21041_2100193	10.229	5.8916	13	CHB_M
rs3808619	ENSG00000104427_C8orf70	ILMN_13979_3120452	9.10958	5.8907	13	CHB_M
rs7314535	ENSG00000010626_LRRC23	ILMN_22825_1940692	10.0068	5.8768	13	CHB_M
rs16896659	ENSG00000132541_HRSP12	ILMN_8062_7550671	11.4369	5.8524	13	CHB_M
rs2923446	ENSG00000176209_C8orf40	ILMN_20841_3830246	12.5688	5.8397	13	CHB_M
rs9897570	ENSG00000072210_ALDH3A2	ILMN_15293_3190328	10.478	5.8126	13	CHB_M
rs2301826	ENSG00000166965_RCCD1	ILMN_26177_5820609	9.92072	5.8024	13	CHB_M
rs9367211	ENSG00000196284_SUPT3H	ILMN_4557_5050402	7.83056	10.131	13	JPT_F
rs492400	ENSG00000144580_RQCD1	ILMN_29301_3990243	9.17168	9.6818	13	JPT_F
rs17543834	ENSG00000198948_MFAP3L	ILMN_22921_10079	6.75472	7.8946	13	JPT_F
rs999474	ENSG00000159199_ATP5G1	ILMN_1759_2680156	10.4747	7.845	13	JPT_F
rs167769	ENSG00000166888_STAT6	ILMN_10634_3420025	10.8911	7.7768	13	JPT_F
rs2012438	ENSG00000160256_C21orf70	ILMN_37174_1110646	7.45886	7.5318	13	JPT_F
rs721328	ENSG00000114446_IFT57	ILMN_21390_3420017	7.68895	7.3965	13	JPT_F
rs9615076	ENSG00000100364_C22orf9	ILMN_2094_6200041	8.78811	7.2027	13	JPT_F
rs1955926	ENSG00000100490_CDKL1	ILMN_7869_6620619	7.45585	7.0217	13	JPT_F
rs6741923	ENSG00000132329_RAMP1	ILMN_16245_460376	7.0056	7.0216	13	JPT_F
rs1544939	ENSG00000171617_ENC1	ILMN_15041_2470053	9.16089	7.0216	13	JPT_F
rs528045	ENSG00000108352_RAPGEFL1	ILMN_20958_6840647	7.58259	6.988	13	JPT_F
rs9321247	ENSG00000154269_ENPP3	ILMN_26967_4640356	6.89234	6.9658	13	JPT_F
rs7780012	ENSG00000185811_IKZF1	ILMN_22185_5900463	9.65353	6.8348	13	JPT_F
rs863582	ENSG00000176945_MUC20	ILMN_18898_7200044	7.07423	6.7636	13	JPT_F
rs9923017	ENSG00000182601_HS3ST4	ILMN_21304_2690243	6.83927	6.7371	13	JPT_F
rs868649	ENSG00000112877_CEP72	ILMN_10995_430279	7.83285	6.6449	13	JPT_F
rs185220	ENSG00000155542_C5orf35	ILMN_28708_4610537	8.80147	6.6421	13	JPT_F
rs9912587	ENSG00000012048_BRCA1	ILMN_5998_3120095	9.51899	6.6282	13	JPT_F
rs1056664	ENSG00000163975_MFI2	ILMN_1398_6660402	8.14112	6.617	13	JPT_F
rs378114	ENSG00000100979_PLTP	ILMN_12725_3130154	9.89847	6.5915	13	JPT_F
rs1573112	ENSG00000138185_ENTPD1	ILMN_7767_1170475	12.5301	6.5624	13	JPT_F
rs9284246	ENSG00000174405_LIG4	ILMN_25322_5670129	7.75137	6.5105	13	JPT_F
rs8339	ENSG00000066926_FECH	ILMN_5447_3170241	9.03556	6.5071	13	JPT_F
rs194256	ENSG00000185261_C5orf36	ILMN_14630_5720615	7.10171	6.378	13	JPT_F
rs367825	ENSG00000104964_AES	ILMN_25081_4920500	7.38404	6.3588	13	JPT_F
rs9257657	ENSG00000204697_ILMN_33317	ILMN_33317_3420598	6.58927	6.3305	13	JPT_F
rs9344826	ENSG00000135336_ORC3L	ILMN_3770_6180367	10.7715	6.3292	13	JPT_F
rs7349405	ENSG00000162994_ILMN_17426	ILMN_17426_1470324	7.99618	6.3082	13	JPT_F
rs13082557	ENSG00000183833_C3orf15	ILMN_28867_6980255	7.22656	6.2773	13	JPT_F
rs2894033	ENSG00000168405_CMAH	ILMN_13868_4010019	8.60271	6.2647	13	JPT_F
rs7834308	ENSG00000205884_ILMN_22682	ILMN_22682_870537	6.6074	6.2509	13	JPT_F
rs10502140	ENSG00000196167_ILMN_6190	ILMN_6190_4590296	6.72007	6.242	13	JPT_F
rs26763	ENSG00000166847_DCTN5	ILMN_22431_2000711	12.2598	6.1938	13	JPT_F
rs7544426	ENSG00000143028_SYPL2	ILMN_18721_6960091	6.72286	6.177	13	JPT_F
rs7959801	ENSG00000089163_SIRT4	ILMN_1274_5670020	7.47739	6.1726	13	JPT_F
rs1833777	ENSG00000161807_OR7G1	ILMN_30219_2260561	6.8107	6.1672	13	JPT_F
rs498726	ENSG00000145545_SRD5A1	ILMN_137031_6900424	9.15479	6.155	13	JPT_F
rs5752083	ENSG00000138867_C22orf13	ILMN_22255_4070070	12.7066	6.1348	13	JPT_F
rs9849087	ENSG00000173230_GOLGB1	ILMN_1500_6250025	10.2301	6.131	13	JPT_F
rs1892312	ENSG00000149657_LSM14B	ILMN_24819_2630059	7.44503	6.0953	13	JPT_F
rs6066093	ENSG00000101017_CD40	ILMN_22820_540725	11.5999	6.0755	13	JPT_F
rs17404237	ENSG00000135211_TMEM60	ILMN_19683_5090309	12.2285	6.0487	13	JPT_F
rs306761	ENSG00000148175_STOM	ILMN_17469_1170390	11.9176	6.0326	13	JPT_F
rs1047418	ENSG00000119684_MLH3	ILMN_17253_60180	7.34517	6.024	13	JPT_F
rs2280902	ENSG00000036448_MYOM2	ILMN_9751_4200685	8.48848	11.3046	13	JPT_M
rs1204504	ENSG00000103202_DECR2	ILMN_7935_3850653	9.10578	9.8148	13	JPT_M
rs12116810	ENSG00000162606_L1TD1	ILMN_19524_6250561	7.7737	9.6788	13	JPT_M
rs4941107	ENSG00000197563_PIGN	ILMN_14232_6220025	10.4843	9.4911	13	JPT_M
rs3809260	ENSG00000111666_CHPT1	ILMN_24076_650504	9.9887	9.4139	13	JPT_M
rs1351383	ENSG00000204261_PSMB9	ILMN_12611_6130669	10.4386	9.0806	13	JPT_M
rs10995	ENSG00000125753_VASP	ILMN_12821_7330767	10.7281	8.9528	13	JPT_M
rs2292362	ENSG00000183634_ILMN_3385	ILMN_3385_4480463	7.60072	8.6618	13	JPT_M
rs11053802	ENSG00000213809_KLRC4	ILMN_29874_6480543	6.82375	8.5966	13	JPT_M
rs6592683	ENSG00000078124_PHCA	ILMN_3836_6550070	8.97463	8.3426	13	JPT_M
rs11601413	ENSG00000166796_LDHC	ILMN_12503_4670414	7.02822	8.3312	13	JPT_M
rs2835255	ENSG00000185917_SETD4	ILMN_28718_4070053	9.01138	8.055	13	JPT_M
rs2138686	ENSG00000198754_OXCT2	ILMN_24641_620066	9.43851	7.8853	13	JPT_M
rs12124078	ENSG00000116771_AGMAT	ILMN_24467_5820189	8.4325	7.8397	13	JPT_M
rs4377140	ENSG00000174177_ILMN_138331	ILMN_138331_6760253	8.0656	7.7647	13	JPT_M
rs2863243	ENSG00000125618_PAX8	ILMN_137172_1070754	7.19533	7.7607	13	JPT_M
rs1241980	ENSG00000116171_SCP2	ILMN_1160_5690678	8.00281	7.6876	13	JPT_M
rs11879943	ENSG00000170892_TSEN34	ILMN_5948_4610433	10.2996	7.622	13	JPT_M
rs7806	ENSG00000101138_CSTF1	ILMN_26845_6250014	7.33187	7.6074	13	JPT_M
rs638820	ENSG00000168765_GSTM4	ILMN_4003_1030070	8.19541	7.5828	13	JPT_M
rs1678305	ENSG00000087008_ACOX3	ILMN_4422_7650575	10.3679	7.564	13	JPT_M
rs11673399	ENSG00000104946_TBC1D17	ILMN_20273_2690215	8.16957	7.5078	13	JPT_M
rs4399540	ENSG00000155666_JMJD5	ILMN_23691_5900717	7.25624	7.4207	13	JPT_M
rs227375	ENSG00000145354_CISD2	ILMN_10566_160332	10.3935	7.4025	13	JPT_M
rs3812618	ENSG00000166321_NUDT13	ILMN_28231_3190608	7.01786	7.379	13	JPT_M
rs1234694	ENSG00000162441_LZIC	ILMN_17648_4060008	8.97512	7.3494	13	JPT_M
rs11767238	ENSG00000064419_TNPO3	ILMN_7153_6650730	10.6127	7.2867	13	JPT_M
rs4654748	ENSG00000142794_NBPF3	ILMN_5339_670242	6.98931	7.2738	13	JPT_M
rs3771138	ENSG00000115756_HPCAL1	ILMN_12582_240019	6.74275	7.175	13	JPT_M
rs382745	ENSG00000197912_SPG7	ILMN_26564_6480332	8.52632	7.1688	13	JPT_M
rs4973431	ENSG00000181798_C2orf52	ILMN_29844_6510246	6.97987	7.1523	13	JPT_M
rs1143684	ENSG00000124588_NQO2	ILMN_26249_870400	8.30719	7.0537	13	JPT_M
rs394283	ENSG00000205057_CLLU1OS	ILMN_29565_4480722	7.03565	7.0144	13	JPT_M
rs7679215	ENSG00000151725_MLF1IP	ILMN_16700_510008	9.65929	6.9296	13	JPT_M
rs754012	ENSG00000139168_ZCRB1	ILMN_9760_4760446	9.18984	6.9201	13	JPT_M
rs4623941	ENSG00000173401_GLIPR1L1	ILMN_6257_1850291	7.18438	6.8752	13	JPT_M
rs2020000	ENSG00000064666_CNN2	ILMN_9368_2350300	12.5639	6.8699	13	JPT_M
rs12639602	ENSG00000163576_EFHB	ILMN_8193_2640402	7.64695	6.8623	13	JPT_M
rs2676520	ENSG00000091409_ITGA6	ILMN_26997_6980187	6.94964	6.8476	13	JPT_M
rs4969384	ENSG00000175866_BAIAP2	ILMN_17382_3520671	7.20224	6.78	13	JPT_M
rs2838367	ENSG00000160213_CSTB	ILMN_26819_6060707	13.4847	6.7288	13	JPT_M
rs669340	ENSG00000176974_SHMT1	ILMN_17710_4050682	11.1751	6.7139	13	JPT_M
rs2295861	ENSG00000106733_C9orf95	ILMN_28428_7320079	9.46161	6.706	13	JPT_M
rs7276633	ENSG00000160207_HSF2BP	ILMN_8863_4860315	6.99379	6.7014	13	JPT_M
rs2232745	ENSG00000168894_RNF181	ILMN_14220_460561	13.1625	6.6662	13	JPT_M
rs1108961	ENSG00000145331_RG9MTD2	ILMN_25906_2450242	8.31517	6.5754	13	JPT_M
rs9304814	ENSG00000131849_ZNF132	ILMN_17488_6550553	7.85312	6.5678	13	JPT_M
rs1691245	ENSG00000197472_ZNF695	ILMN_11705_6650273	8.17723	6.5565	13	JPT_M
rs2447196	ENSG00000140264_SERF2	ILMN_27741_6650402	7.17454	6.4744	13	JPT_M
rs6568629	ENSG00000112218_GPR63	ILMN_25570_2350605	8.30884	6.4349	13	JPT_M
rs2632661	ENSG00000060709_RIMBP2	ILMN_13845_2470154	7.39475	6.4252	13	JPT_M
rs538238	ENSG00000104055_TGM5	ILMN_15185_10402	9.79164	6.4156	13	JPT_M
rs2438517	ENSG00000161277_THAP8	ILMN_25578_870039	7.15445	6.4133	13	JPT_M
rs11552229	ENSG00000163131_CTSS	ILMN_13149_4560598	9.31371	6.3957	13	JPT_M
rs2365403	ENSG00000154217_PITPNC1	ILMN_12660_5960189	8.12759	6.3887	13	JPT_M
rs713571	ENSG00000105928_DFNA5	ILMN_7276_6290064	13.3056	6.3786	13	JPT_M
rs9495076	ENSG00000051620_HEBP2	ILMN_21130_5090184	11.4801	6.3726	13	JPT_M
rs1058142	ENSG00000102796_DHRS12	ILMN_18158_670131	7.43062	6.3317	13	JPT_M
rs7194052	ENSG00000186153_WWOX	ILMN_21082_6380653	7.05241	6.2706	13	JPT_M
rs1130127	ENSG00000182551_ADI1	ILMN_29081_4760615	11.5187	6.2275	13	JPT_M
rs2298914	ENSG00000117533_VAMP4	ILMN_139375_1690647	9.47791	6.2201	13	JPT_M
rs17168179	ENSG00000196636_ACN9	ILMN_6296_3460402	11.2523	6.2176	13	JPT_M
rs2243523	ENSG00000141560_ILMN_14939	ILMN_14939_6590386	12.4231	6.1984	13	JPT_M
rs1148455	ENSG00000187545_PRAMEF10	ILMN_137566_50086	6.70825	6.1847	13	JPT_M
rs10411704	ENSG00000105695_MAG	ILMN_16548_2140148	7.42456	6.1767	13	JPT_M
rs17744934	ENSG00000186162_ILMN_139045	ILMN_139045_6350414	11.1802	6.1649	13	JPT_M
rs1683570	ENSG00000175221_MED16	ILMN_137150_4590392	7.96049	6.164	13	JPT_M
rs6537597	ENSG00000148826_NKX6-2	ILMN_21749_730082	6.82059	6.1627	13	JPT_M
rs429166	ENSG00000172315_TP53RK	ILMN_20784_3800181	10.1965	6.1521	13	JPT_M
rs9726996	ENSG00000162627_SNX7	ILMN_11010_7100474	6.84621	6.1226	13	JPT_M
rs1343778	ENSG00000171488_LRRC8C	ILMN_1023_3870102	8.92044	6.1168	13	JPT_M
rs1863332	ENSG00000143933_ILMN_7659	ILMN_7659_4230112	14.7734	6.0676	13	JPT_M
rs16822638	ENSG00000169047_IRS1	ILMN_18432_1260612	6.90754	6.0589	13	JPT_M
rs3826161	ENSG00000140931_CMTM3	ILMN_15078_7380239	9.86299	6.0515	13	JPT_M
rs2270537	ENSG00000162526_TSSK3	ILMN_29356_2490270	6.99463	6.0371	13	JPT_M
rs9405611	ENSG00000137274_BPHL	ILMN_27041_4150193	9.95605	6.0331	13	JPT_M
rs1421140	ENSG00000106484_MEST	ILMN_22073_6220632	7.0719	6.0207	13	JPT_M
rs11210675	ENSG00000066185_ZMYND12	ILMN_456_5960746	8.05013	6.0063	13	JPT_M
rs1004579	ENSG00000071246_VASH1	ILMN_4905_1820039	7.45931	5.9966	13	JPT_M
rs2289265	ENSG00000055147_C5orf3	ILMN_19681_1170079	8.68815	5.9952	13	JPT_M
rs10149578	ENSG00000187790_FANCM	ILMN_29331_4880707	6.93961	5.9878	13	JPT_M
rs3809325	ENSG00000123179_EBPL	ILMN_18169_6560333	11.2972	5.9767	13	JPT_M
rs11121828	ENSG00000177000_MTHFR	ILMN_137842_4890450	7.45908	5.9363	13	JPT_M
rs10896398	ENSG00000162341_TPCN2	ILMN_29131_1770286	8.65516	5.9258	13	JPT_M
rs252070	ENSG00000161011_SQSTM1	ILMN_22135_940142	10.9974	5.9222	13	JPT_M
rs7539800	ENSG00000197429_IPP	ILMN_21538_6180020	8.26615	5.9124	13	JPT_M
rs6487460	ENSG00000065970_FOXJ2	ILMN_27729_6020482	11.0063	5.9074	13	JPT_M
rs10431150	ENSG00000162105_SHANK2	ILMN_1021_3850148	6.61702	5.8924	13	JPT_M
rs7094598	ENSG00000151640_DPYSL4	ILMN_7518_4780564	8.83453	5.8681	13	JPT_M
rs9368813	ENSG00000124507_PACSIN1	ILMN_1964_3780603	7.2991	5.8497	13	JPT_M
rs11130525	ENSG00000180376_CCDC66	ILMN_20485_3400209	8.42179	5.8126	13	JPT_M
rs7998180	ENSG00000186184_POLR1D	ILMN_28050_2470551	11.6685	5.8063	13	JPT_M
rs3782079	ENSG00000175634_RPS6KB2	ILMN_25041_4050376	9.3441	5.7891	13	JPT_M
rs2649649	ENSG00000198561_CTNND1	ILMN_138939_110376	6.5718	5.766	13	JPT_M
rs11836987	ENSG00000111728_ST8SIA1	ILMN_9987_4260309	6.60962	5.7646	13	JPT_M
rs8004545	ENSG00000166126_AMN	ILMN_28146_6840148	7.01877	5.7605	13	JPT_M
rs1281152	ENSG00000125089_SH3TC1	ILMN_7001_5490259	9.82091	5.7242	13	JPT_M
rs7157201	ENSG00000165898_ISCA2	ILMN_8677_1240465	12.8916	5.7193	13	JPT_M
rs6035269	ENSG00000132669_RIN2	ILMN_17838_150195	7.00744	5.7176	13	JPT_M
rs12148	ENSG00000025708_ECGF1	ILMN_18760_6130563	8.90616	5.7086	13	JPT_M
rs12601614	ENSG00000166750_SLFN5	ILMN_25790_1110273	8.31199	9.7637	16	YRI_F
rs7524477	ENSG00000116205_C1orf83	ILMN_17188_4780537	8.33097	9.3805	16	YRI_F
rs6558165	ENSG00000147439_BIN3	ILMN_15535_7550392	6.94961	9.2004	16	YRI_F
rs2302443	ENSG00000146909_NOM1	ILMN_21256_4230681	7.03414	9.031	16	YRI_F
rs1319763	ENSG00000141698_NT5C3L	ILMN_24101_4040048	9.82127	8.9017	16	YRI_F
rs7924806	ENSG00000177697_CD151	ILMN_139293_4830504	8.32722	8.5438	16	YRI_F
rs7739209	ENSG00000168566_C6orf151	ILMN_11395_4150324	7.74512	8.3431	16	YRI_F
rs11075338	ENSG00000103489_XYLT1	ILMN_71794_5390187	7.13793	8.0542	16	YRI_F
rs9496604	ENSG00000146416_AIG1	ILMN_22004_5490360	8.60579	8.0048	16	YRI_F
rs8078984	ENSG00000136436_CALCOCO2	ILMN_23867_2570598	9.03989	7.6013	16	YRI_F
rs12709088	ENSG00000167526_RPL13	ILMN_2271_290646	13.6515	7.4559	16	YRI_F
rs1948721	ENSG00000180611_C3orf59	ILMN_14619_7510148	9.99512	7.4543	16	YRI_F
rs2703534	ENSG00000108669_PSCD1	ILMN_16992_6480707	11.2154	7.3838	16	YRI_F
rs4801225	ENSG00000197128_ZNF772	ILMN_7116_2450131	8.51946	7.3065	16	YRI_F
rs7830870	ENSG00000156006_NAT2	ILMN_15024_780743	6.88087	7.2886	16	YRI_F
rs1434960	ENSG00000158604_TMED4	ILMN_128814_5960180	9.584	7.2853	16	YRI_F
rs823066	ENSG00000133065_SLC41A1	ILMN_2825_620746	8.04091	7.2085	16	YRI_F
rs2198797	ENSG00000166002_C11orf75	ILMN_9654_1260048	11.7985	7.1924	16	YRI_F
rs2247280	ENSG00000177738_ILMN_46502	ILMN_46502_2640541	6.96176	7.1426	16	YRI_F
rs12279227	ENSG00000187151_ANGPTL5	ILMN_15984_2940347	6.64887	7.1	16	YRI_F
rs7271152	ENSG00000149599_C20orf57	ILMN_91090_4230646	6.87057	6.9679	16	YRI_F
rs328632	ENSG00000143797_MBOAT2	ILMN_17785_2640433	7.4343	6.8905	16	YRI_F
rs12661431	ENSG00000146278_PNRC1	ILMN_24710_5310537	7.58216	6.8586	16	YRI_F
rs6738356	ENSG00000030419_IKZF2	ILMN_18515_2340546	8.4827	6.8542	16	YRI_F
rs7720490	ENSG00000145495_MARCH6	ILMN_2629_1980577	9.34923	6.8387	16	YRI_F
rs6807033	ENSG00000091972_CD200	ILMN_137798_6450056	8.42661	6.7857	16	YRI_F
rs368664	ENSG00000162817_C1orf115	ILMN_30321_2470491	8.24479	6.6488	16	YRI_F
rs10841413	ENSG00000139155_SLCO1C1	ILMN_22034_2100161	6.48204	6.6065	16	YRI_F
rs2033262	ENSG00000204666_ILMN_8081	ILMN_8081_7100110	6.91434	6.6013	16	YRI_F
rs6553010	ENSG00000109794_ILMN_20124	ILMN_20124_1090482	7.78062	6.5965	16	YRI_F
rs7092454	ENSG00000150076_C10orf68	ILMN_11867_5560240	6.86326	6.5763	16	YRI_F
rs11997273	ENSG00000120526_NUDCD1	ILMN_24586_4610068	8.44466	6.562	16	YRI_F
rs7734456	ENSG00000145907_G3BP1	ILMN_72261_730168	6.66829	6.5222	16	YRI_F
rs2045660	ENSG00000141570_CBX8	ILMN_16376_3060612	7.51847	6.4119	16	YRI_F
rs3014823	ENSG00000188643_S100A16	ILMN_2047_5570129	7.28372	6.4076	16	YRI_F
rs484262	ENSG00000212703_TMEM137	ILMN_5744_3890092	7.09778	6.3832	16	YRI_F
rs2704804	ENSG00000163421_PROK2	ILMN_16792_2140497	6.75154	6.333	16	YRI_F
rs3739890	ENSG00000125485_DDX31	ILMN_2241_3170703	6.65869	6.3246	16	YRI_F
rs9882171	ENSG00000188846_RPL14	ILMN_138835_3800280	14.0475	6.3116	16	YRI_F
rs16944715	ENSG00000103248_MTHFSD	ILMN_23689_4540192	7.93575	6.3027	16	YRI_F
rs17082396	ENSG00000205822_ILMN_137465	ILMN_137465_3290121	6.5998	6.2711	16	YRI_F
rs1893126	ENSG00000168461_RAB31	ILMN_6528_7570603	11.7534	6.2152	16	YRI_F
rs12700451	ENSG00000169193_CCDC126	ILMN_24365_360379	8.40229	6.212	16	YRI_F
rs7929028	ENSG00000156587_UBE2L6	ILMN_7531_4490592	14.3441	6.1969	16	YRI_F
rs11800321	ENSG00000117226_GBP3	ILMN_3653_5340136	7.65372	6.1789	16	YRI_F
rs3809096	ENSG00000166796_LDHC	ILMN_12503_4670414	6.96057	6.1742	16	YRI_F
rs7461545	ENSG00000104361_NPAL2	ILMN_9453_1070082	7.52378	6.1724	16	YRI_F
rs9812373	ENSG00000121879_PIK3CA	ILMN_32804_3450243	6.68776	6.1721	16	YRI_F
rs2326765	ENSG00000124491_F13A1	ILMN_9687_1300095	8.58507	10.5858	16	YRI_M
rs2928140	ENSG00000051180_RAD51	ILMN_4856_3830600	7.2791	10.5207	16	YRI_M
rs8065665	ENSG00000108352_RAPGEFL1	ILMN_20958_6840647	7.7137	10.4849	16	YRI_M
rs9295813	ENSG00000111859_NEDD9	ILMN_137978_6280722	7.41531	8.8262	16	YRI_M
rs11878430	ENSG00000142528_ZNF473	ILMN_27390_7040521	7.78685	8.6407	16	YRI_M
rs7008265	ENSG00000182307_C8orf33	ILMN_15901_3830278	10.4346	8.2866	16	YRI_M
rs3180413	ENSG00000196072_BLOC1S2	ILMN_8691_4010470	7.12061	8.0509	16	YRI_M
rs832884	ENSG00000166839_ANKDD1A	ILMN_6117_3290296	8.3609	7.8078	16	YRI_M
rs6478813	ENSG00000148339_SLC25A25	ILMN_15178_2640129	6.89933	7.734	16	YRI_M
rs7088166	ENSG00000197771_C10orf119	ILMN_13531_4830192	8.38758	7.5068	16	YRI_M
rs7148709	ENSG00000183648_NDUFB1	ILMN_28096_6130100	7.67764	7.4903	16	YRI_M
rs11264448	ENSG00000160783_BGLAP	ILMN_17038_4610131	7.61166	7.2682	16	YRI_M
rs35156365	ENSG00000128309_MPST	ILMN_2450_6100575	8.38385	7.2302	16	YRI_M
rs2071477	ENSG00000204261_PSMB9	ILMN_12611_6130669	10.5646	7.2225	16	YRI_M
rs6488889	ENSG00000111358_GTF2H3	ILMN_9713_3710475	10.2668	7.1434	16	YRI_M
rs989128	ENSG00000006282_SPATA20	ILMN_23134_4120133	9.23123	7.0882	16	YRI_M
rs1063964	ENSG00000075142_SRI	ILMN_10963_3460097	9.07998	7.0577	16	YRI_M
rs6486574	ENSG00000060709_RIMBP2	ILMN_13845_2470154	7.22056	7.0512	16	YRI_M
rs11907843	ENSG00000101181_GTPBP5	ILMN_6997_6040092	7.28051	7.0396	16	YRI_M
rs12170971	ENSG00000188677_PARVB	ILMN_545_6200647	12.3292	7.0312	16	YRI_M
rs6706901	ENSG00000123600_METTL8	ILMN_32387_3170605	6.4719	7.0254	16	YRI_M
rs12437386	ENSG00000129538_RNASE1	ILMN_22847_540670	7.60039	6.9703	16	YRI_M
rs13411556	ENSG00000122085_MTERFD2	ILMN_4915_3930113	6.97356	6.9664	16	YRI_M
rs8073596	ENSG00000159199_ATP5G1	ILMN_1759_2680156	9.66579	6.9474	16	YRI_M
rs9565032	ENSG00000204899_ILMN_35014	ILMN_35014_840450	9.62749	6.9014	16	YRI_M
rs7796100	ENSG00000106121_ILMN_22269	ILMN_22269_6100471	7.48399	6.888	16	YRI_M
rs12101216	ENSG00000119698_KIAA1622	ILMN_20971_4040176	6.82808	6.8661	16	YRI_M
rs7180217	ENSG00000140450_ARRDC4	ILMN_11014_7040187	6.75383	6.8573	16	YRI_M
rs11646366	ENSG00000213957_ILMN_22977	ILMN_22977_2690056	7.49422	6.817	16	YRI_M
rs3809325	ENSG00000123179_EBPL	ILMN_18169_6560333	11.3976	6.7799	16	YRI_M
rs12113646	ENSG00000146757_ZNF92	ILMN_17299_770040	7.32747	6.7702	16	YRI_M
rs7194091	ENSG00000196696_PDXDC2	ILMN_41153_3870564	6.93193	6.7192	16	YRI_M
rs2073184	ENSG00000112146_FBXO9	ILMN_4500_7330253	6.85654	6.6246	16	YRI_M
rs17286686	ENSG00000125741_OPA3	ILMN_22964_1940020	7.65551	6.6105	16	YRI_M
rs7549628	ENSG00000197568_HHLA3	ILMN_137330_3400091	8.38594	6.6014	16	YRI_M
rs344076	ENSG00000178110_ILMN_39139	ILMN_39139_4480500	7.12225	6.5271	16	YRI_M
rs1006974	ENSG00000122863_CHST3	ILMN_7808_5220678	7.03929	6.5152	16	YRI_M
rs10857472	ENSG00000204161_C10orf128	ILMN_31945_4060538	8.57985	6.5128	16	YRI_M
rs3733236	ENSG00000138744_ASAHL	ILMN_4346_730750	8.86903	6.5112	16	YRI_M
rs9659081	ENSG00000172018_ILMN_28469	ILMN_28469_1990044	7.06659	6.416	16	YRI_M
rs70692	ENSG00000112053_SLC26A8	ILMN_20343_150497	6.75459	6.4026	16	YRI_M
rs9429829	ENSG00000143469_SYT14	ILMN_12853_2100735	6.61179	6.3823	16	YRI_M
rs16962699	ENSG00000134758_RNF138	ILMN_587_1230484	10.3904	6.3785	16	YRI_M
rs7583316	ENSG00000198369_SPRED2	ILMN_12131_4120408	7.84862	6.3383	16	YRI_M
rs7544663	ENSG00000007341_ST7L	ILMN_24639_3060014	7.60722	6.3258	16	YRI_M
rs10277	ENSG00000161011_SQSTM1	ILMN_22135_940142	10.9086	6.3028	16	YRI_M
rs17133828	ENSG00000185811_IKZF1	ILMN_22185_5900463	9.36974	6.2767	16	YRI_M
rs10749504	ENSG00000148600_PCDH21	ILMN_8172_4210022	7.06171	6.2665	16	YRI_M
rs4543479	ENSG00000005075_POLR2J	ILMN_4217_4810594	8.50501	6.2511	16	YRI_M
rs7118396	ENSG00000134575_ACP2	ILMN_3044_7050180	8.18994	6.24	16	YRI_M
rs4920624	ENSG00000117122_MFAP2	ILMN_30237_3370017	6.86704	6.2276	16	YRI_M
rs402514	ENSG00000170291_C17orf81	ILMN_12463_540537	7.48358	6.1931	16	YRI_M
rs212498	ENSG00000073598_FNDC8	ILMN_3690_130554	6.97744	6.1855	16	YRI_M
